# Supplementary material for: Effect of Adjuvant Radiation Dose on Survival in Patients with Esophageal Squamous Cell Carcinoma
Source: MDPI journal article supplement (doi:10.3390/cancers14235879), 2022-11-29
Supplement: s1 [file s1]

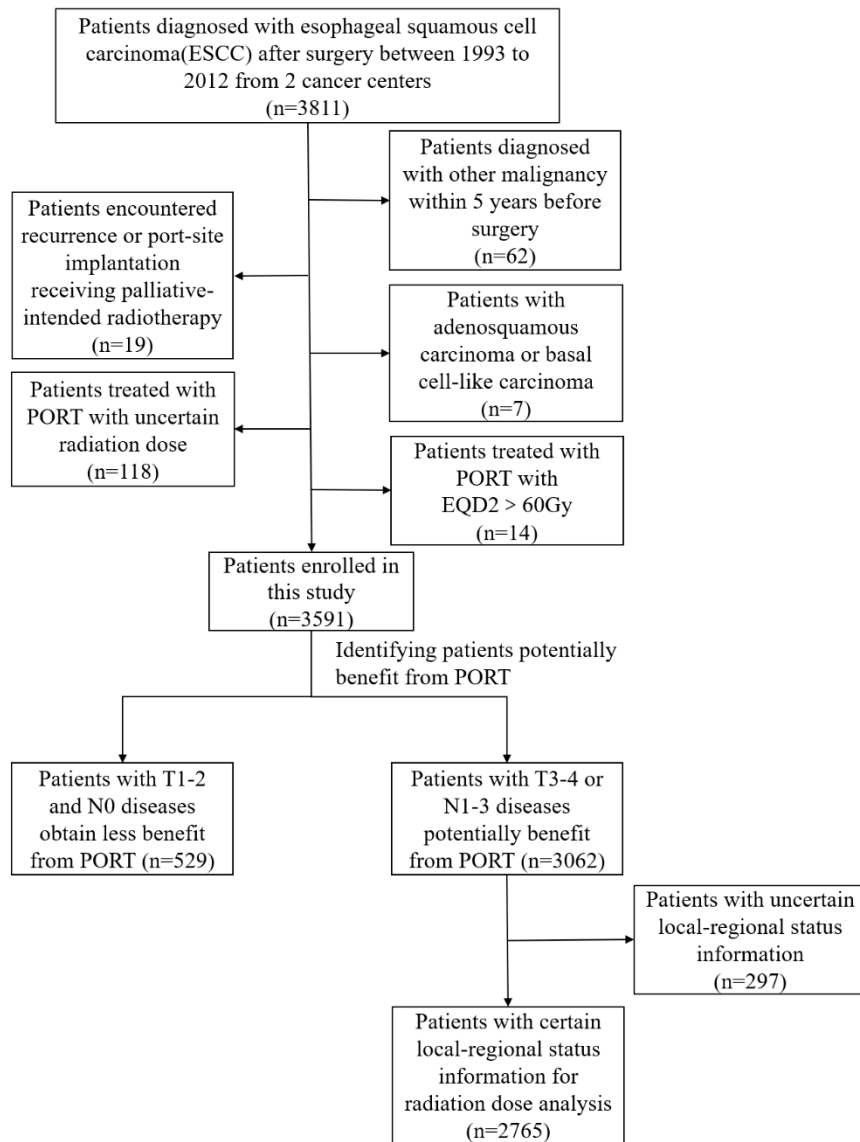

Supplementary Figure S1. CONSORT diagram of patient selection.

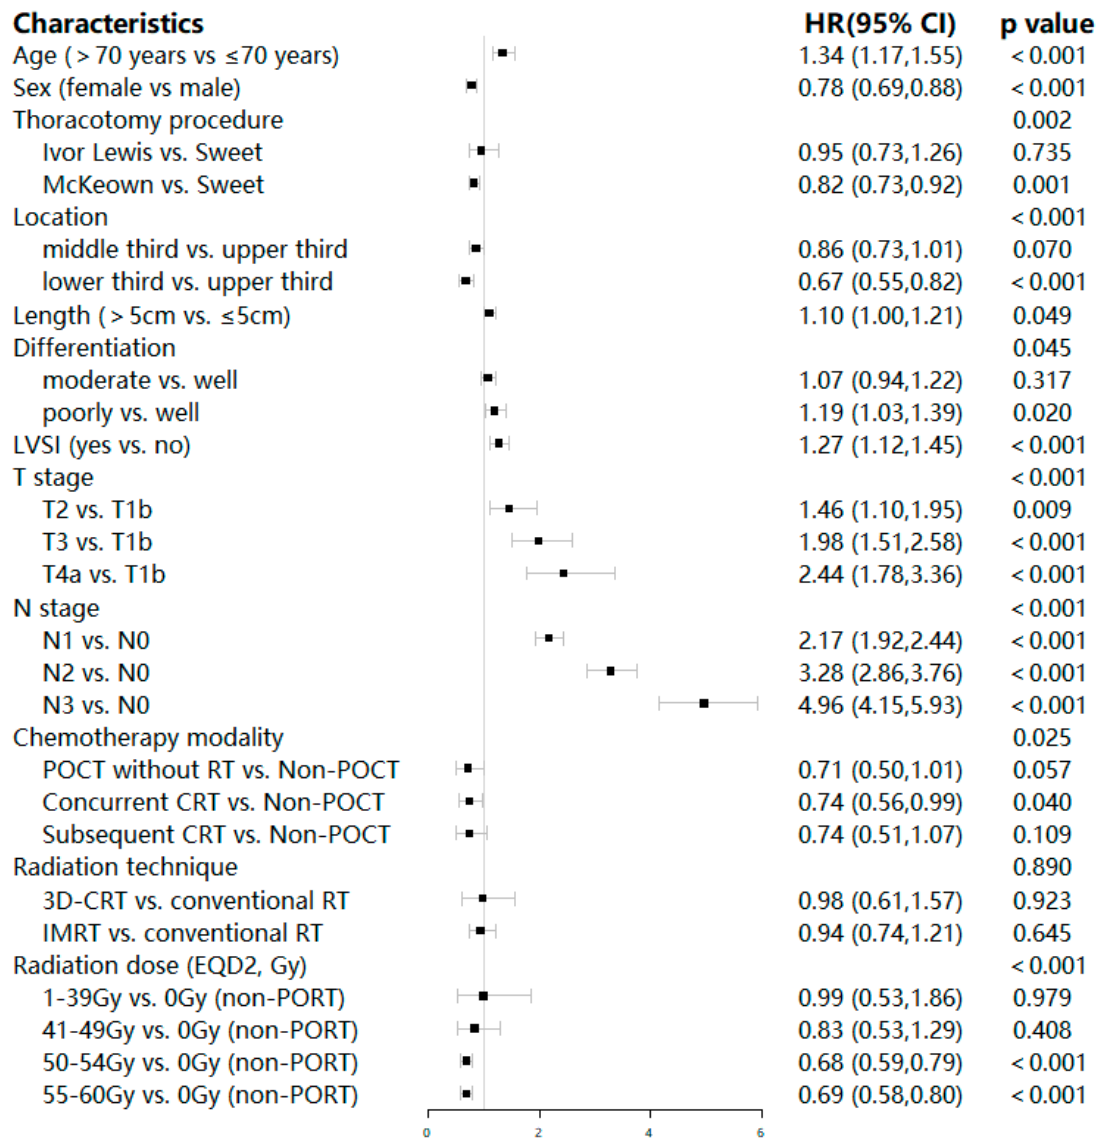

Supplementary Figure S2. Forest plots of Cox proportional hazard regression multivariable analysis of overall survival.
